# Supplementary material for: Mitochondria chaperone GRP75 moonlighting as a cell cycle controller to derail endocytosis provides an opportunity for nanomicrosphere intracellular delivery
Source: PubMed Central journal article supplement (PMC5601673; doi:10.18632/oncotarget.17234), 2017-04-19
Supplement: oncotarget-08-58536-s001.pdf [file oncotarget-08-58536-s001.pdf]

# Mitochondria chaperone GRP75 moonlighting as a cell cycle controller to derail endocytosis provides an opportunity for nanomicrosphere intracellular delivery

## SUPPLEMENTARY MATERIALS

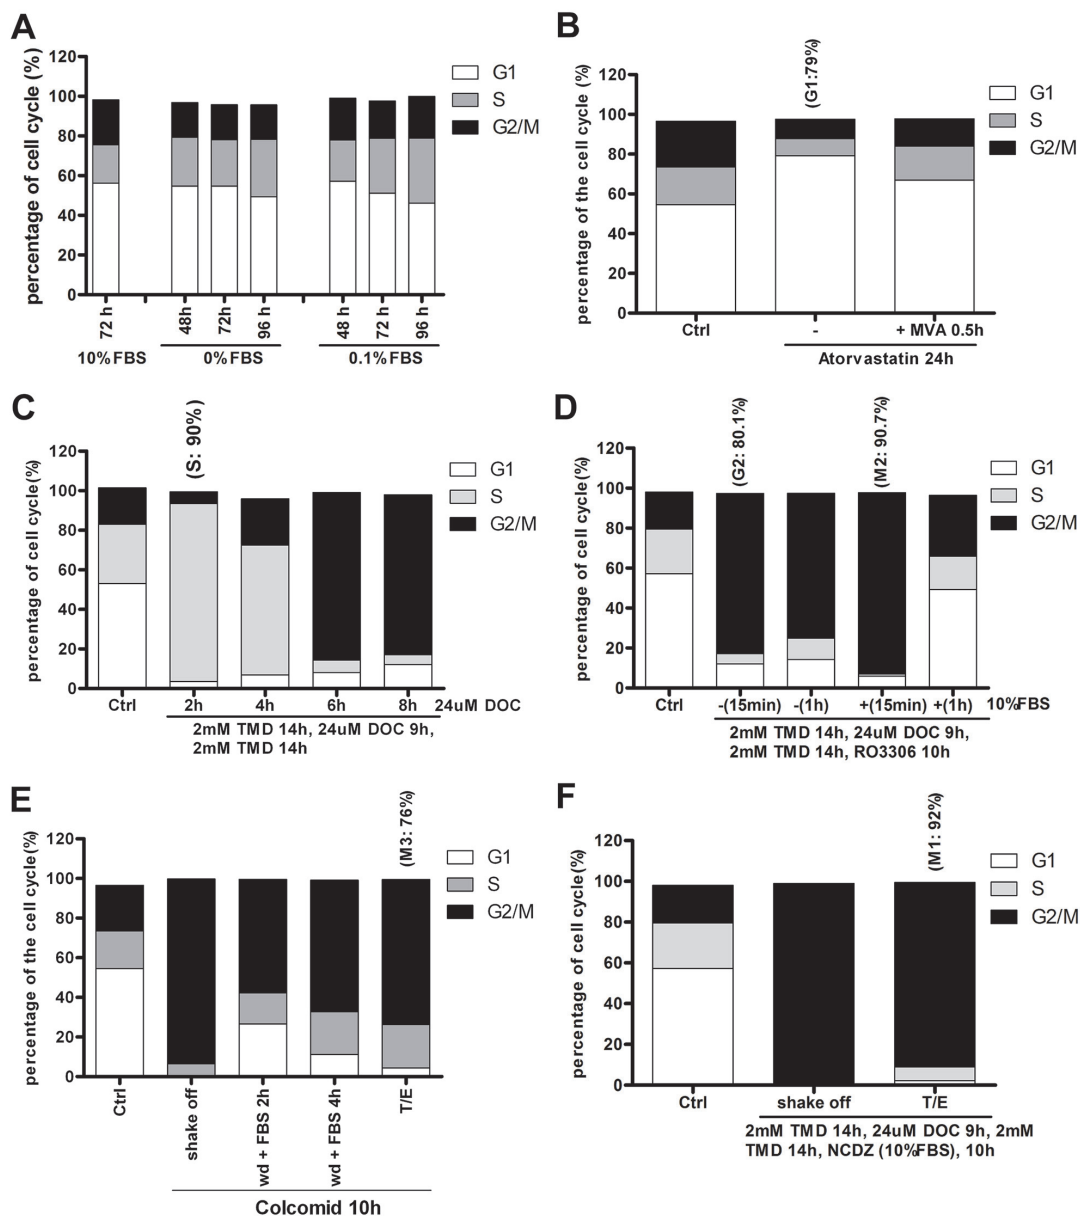

**Supplementary Figure 1: Cell cycle arrest induced by drugs treatment.** Serum-starved or drugs-treated HeLa cells were collected by T/E digestion and transferred for cell cycle determination by flow cytometry analysis. **(A)** No G1-phase arrest was reached after 0% or 0.1% serum starvation; **(B)** G1-phase arrest was maximally reached after atorvastatin (20uM) incubation without mevalonic acid (60uM) further incubation; **(C)** S-phase arrest was maximally reached after two rounds of thymidine (2mM) incubation followed by deoxycytidine (24uM) incubation for 2 hours; **(D)** Maximal G2-phase arrest was reached after two rounds of thymidine incubation followed by RO3306 (10uM) incubation, then slippage to the M-phase (M2) was reached after 15 min 10% FBS stimulation; **(E)** M-phase arrest (M3) was largely reached after colcemid (0.1uM) incubation followed by shaking to get rid of suspended cells; **(F)** M-phase arrest (M1) was maximally reached after sequentially added thymidine and deoxycytidine followed by noxodazole (0.1ug/mL) incubation for two rounds. Similar results were found in Cos-7 cells (data not shown).

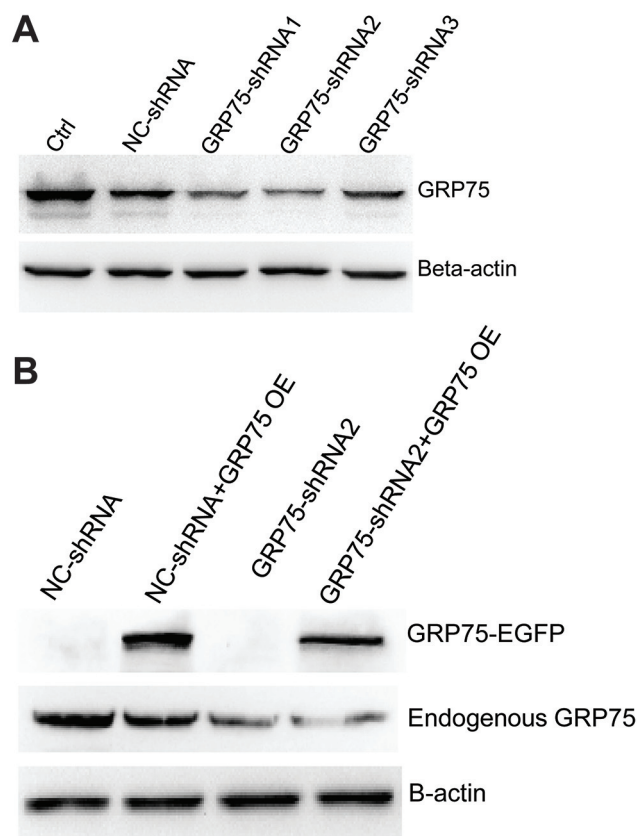

**Supplementary Figure 2: Checking GRP75 interference level after knockdown and/or overexpression.** (A) Equal amount (10ug) of cell lysate from GRP75-shRNA stable cell lines were separated on SDS-PAGE and subjected to Western blot analyses. (B) GRP75-shRNA2 stable cells were transiently transfected with GRP75 constructs for overexpression, and equal amount of cell lysates were blotted with mouse anti-GRP75 Ab (middle row), rabbit anti-GFP Ab (upper row) and anti-B-actin (lower row), respectively.

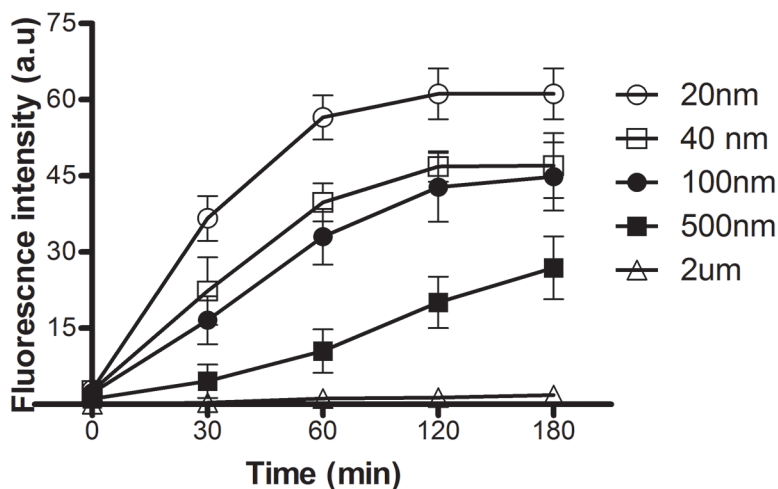

**Supplementary Figure 3: Cellular evaluation of the dynamic uptake of nanomicrospheres.** HeLa cells were incubated with size-differed fluorescent microspheres (1:300) for indicated time periods. Subsequently, cells were trypsinized, collected, unbound microspheres were washed off, and cells were processed for flow cytometry analysis. Cells incubated with serum-free media were used to calculate time zero. Results show that small sized microspheres had a quicker and higher uptake in intracellular fluorescent intensity compared to large sized microspheres. Uptake of fluorescent microspheres smaller than 500nm reached a plateau after 2–3 hours, indicating saturated binding on HeLa cells.

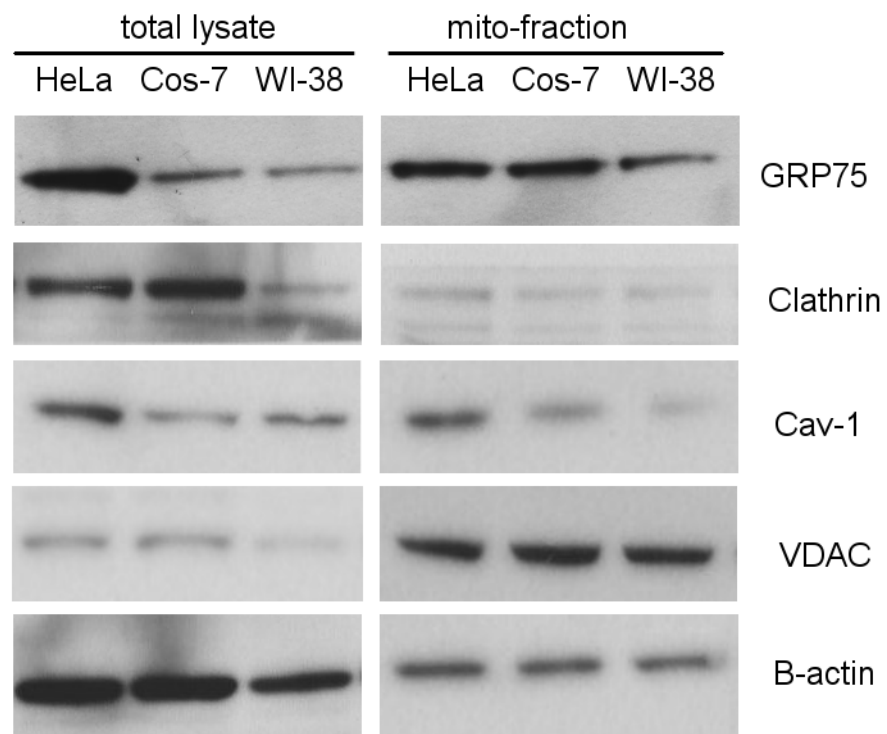

**Supplementary Figure 4: Western blot analysis of GRP75 level in cell lines.** Subcellular fractions (10ug per lane) extracted from HeLa, Cos-7, and WI-38 cells were blotted with mouse anti-GRP75 Ab, anti-clathrin Ab, anti-caveolin-1, and rabbit anti-VDAC Ab, respectively. mito-: mitochondrial lysate.

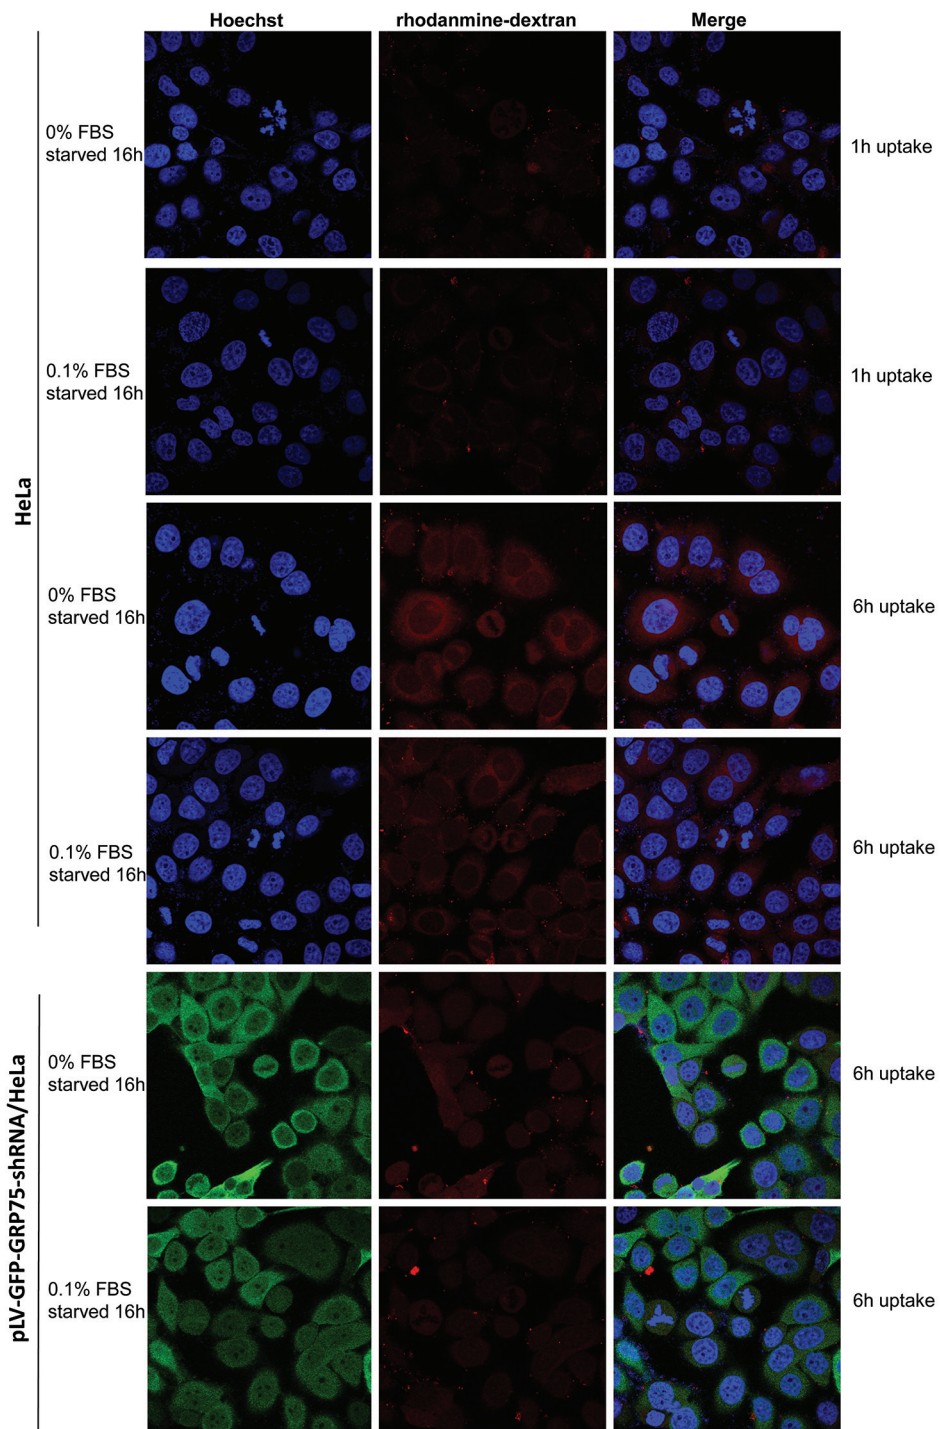

**Supplementary Figure 5: Faint macropinocytosis only occurs in heavily starved cells.** HeLa and GRP75-shRNA stably transduced HeLa cells were first starved for 16 hours respectively, then incubated with Rhodamine labeled-dextran (5mg/ml) at 37 °C for different times, rinsed with PBS/0.5M NaCl, and visualized via confocal microscopy. Representative images from three independent experiments are shown. No uptake was detected in non-starved cells (Data not shown).

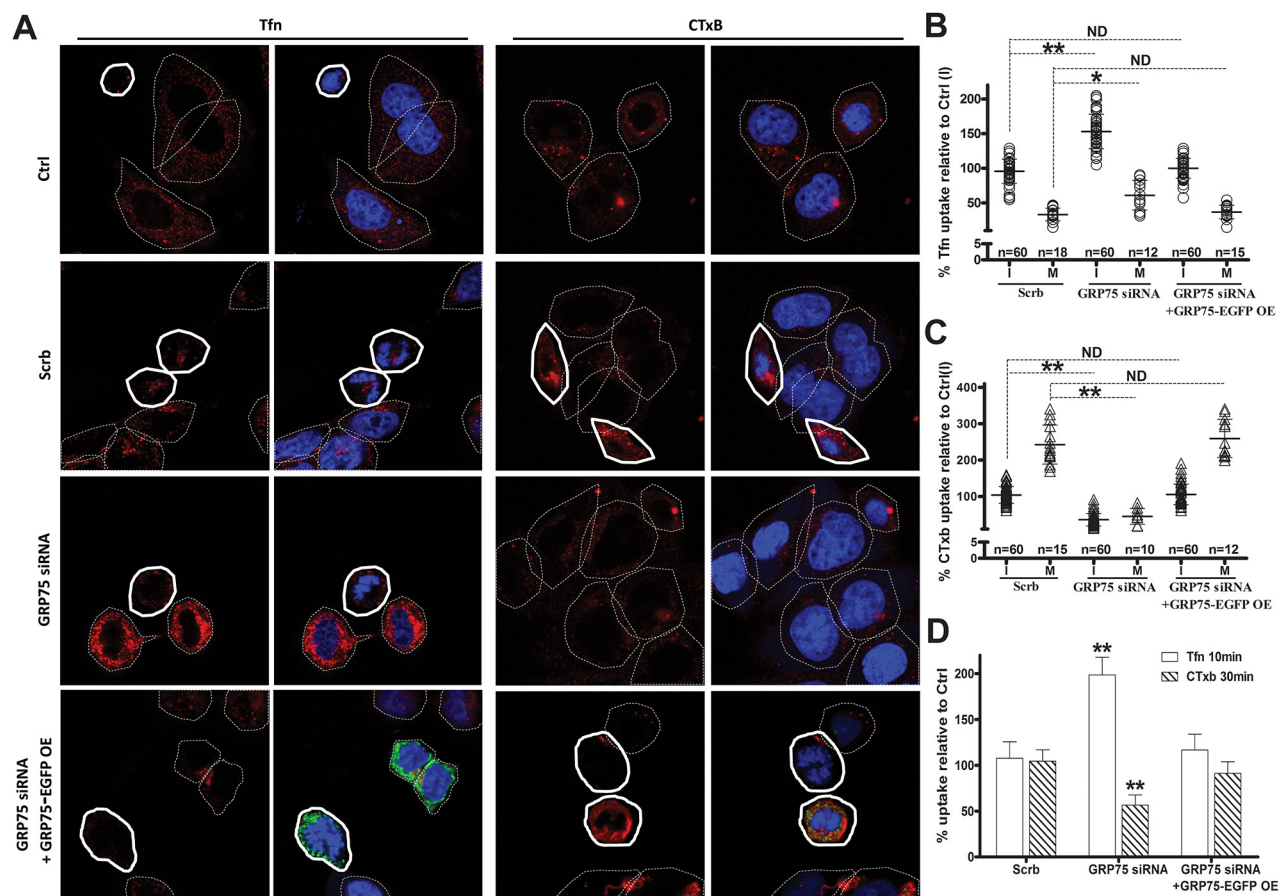

**Supplementary Figure 6: GRP75 overexpression reverses the endocytosis changes induced by its knock-down.** HeLa cells were transiently transfected with GRP75 siRNA pool, or scramble siRNA (Scr) as previously described [32], further rescued by GRP75-EGFP plasmid overexpression. The uptake levels of Tf $\alpha$ -AF647 and CTxB-AF647 in cells were determined by confocal imaging analysis, and representative images are shown in (A). Scatterplot depicts the uptake variability of indicated ligands, and the uptake levels in M (polygons with bold solid line) or I phase (polygons with thin dotted line) cells are respectively quantified in (B) and (C) with comparison to that of untransfected cells in I phase as Ctrl (I). At least 60 cells counted for I phase and  $\geq 10$  cells counted for M phase for each transfection. (D) The uptake levels of Tf $\alpha$ -AF647 and CTxB-AF647 in transfected cell population were analyzed and quantified by FACS. 10000 cells counted per sample in each experiment. Statistically significant differences compared with untransfected cells (Ctrl) are shown. \*\*  $P < 0.01$ , \*  $P < 0.05$ , ND: no difference.

Supplementary Table 1: Bioinformatics prediction of the subcellular localization of EGFP-fused GRP75 constructs

| Constructs    | WOLF PSORT                                   | TargetP 1.1 |      |       | MitoProt II |                            |
|---------------|----------------------------------------------|-------------|------|-------|-------------|----------------------------|
|               | main location of prediction                  | mTP         | SP   | other | Loc         | Targeting mito probability |
| EGFP-GRP75    | cyto:19,cyto_<br>nucl:14,nucl:7,mito:2       | 0.02        | 0.54 | 0.76  | -           | 7.39%                      |
| GRP75-EGFP    | mito:26,cyto_<br>mito:16.3333,cyto:4.5       | 0.92        | 0.01 | 0.11  | M           | 76.84%                     |
| EGFP-ΔS GRP75 | cyto:19.5,cyto_<br>nucl:13.5,nucl:6.5,mito:2 | 0.02        | 0.54 | 0.76  | -           | 7.25%                      |
| ΔS GRP75-EGFP | cyto:21,nucl:4,mito:4                        | 0.08        | 0.14 | 0.85  | -           | 5.1%                       |

In WOLF PSORT, the bigger the scores, the more the probability; In TargetP, note that the scores are not real probabilities, however, the location with the highest score is the most likely according to TargetP; C, chloroplast; M, mitochondrion; S, secretory pathway; cTP, chloroplast transit peptide; mTP, mitochondrial targeting peptide; SP: secretory pathway signal peptide.

Supplementary Table 2: Cell cycle data of MKT-077 treated cells (n = 3)

| Cell-cycle phase distribution (%) |      | Normal group | DMSO     |          | MKT-077  |            |            |            |
|-----------------------------------|------|--------------|----------|----------|----------|------------|------------|------------|
|                                   |      |              | (0.1%)   | (0.4%)   | (5 uM)   | (10 uM)    | (20 uM)    | (40uM)     |
| HeLa                              | G1   | 49.9±0.9     | 50.6±0.2 | 53.1±0.2 | 56.9±0.6 | 61.1±0.8** | 72.6±0.6** | 81.2±0.9** |
|                                   | S    | 14.5±0.5     | 20.5±0.7 | 21.4±0.6 | 20.0±0.5 | 21.0±0.2** | 14.8±0.6** | 6.3±0.6**  |
|                                   | G2/M | 33.8±0.6     | 26.1±0.3 | 22.7±0.4 | 21.6±0.9 | 15.9±0.4** | 11.3±0.5** | 8.7±0.4**  |
| Cos-7                             | G1   | 46.1±0.6     | 46.4±0.7 | 48.9±0.8 | 49.4±0.7 | 50.7±0.5   | 53.2±0.1   | 64.4±0.8   |
|                                   | S    | 32.5±0.2     | 33.1±0.3 | 31.3±0.3 | 31.8±0.6 | 33.3±0.8   | 30.2±0.5   | 23.6±0.4** |
|                                   | G2/M | 13.8±0.4     | 13.2±0.4 | 14.6±0.5 | 14.1±0.8 | 12.2±0.2   | 12.8±0.7   | 10.4±0.2** |

\*\*Significantly different from the normal group ( $P < 0.01$ ).
